# Supplementary material for: Investigation on the promotional role of Ga2O3on the CuO–ZnO/HZSM-5 catalyst for CO2hydrogenation
Source: Royal Society of Chemistry journal article supplement (doi:10.1039/d0ra10849a), 2021-01-01
Supplement: d0ra10849a1.pdf [file d0ra10849a1.pdf]

# Investigation on the Promotional Role of Ga<sub>2</sub>O<sub>3</sub> on CuO-ZnO/HZSM-5 Catalyst for CO<sub>2</sub> Hydrogenation

Jie Du, Yajing Zhang\*, Kangjun Wang\*, Fu Ding, Songyan Jia, Guoguo Liu, Limei Tan

## Supporting information

### TEM

#### Catalyst characterization

The surface morphology of the catalyst was characterized by the transmission electron microscope (TEM). TEM images were collected on a Hitachi HT7800 with an accelerating voltage of 100 kV.

#### Results and discussion

In order to obtain insight into the morphology of the catalysts, transmission electron microscopy (TEM) was conducted on the representative CZG<sub>0</sub>H and CZG<sub>5</sub>H samples. From the two sets of comparative catalyst TEM photos in Figure S4, it can be seen intuitively that the components in the catalyst exist in the form of aggregates, and the interface between the particles in the aggregates is blurred<sup>1</sup>. As shown in Figure S4a, catalyst consists of particles with large spherical shapes, and the majority of them are clustered together. In contrast, individual separated oxide particles are easier distinguished on the sample CZG<sub>5</sub>H, and particles are spherical and uniformly distributed (Figure S4b). The average diameter of the particles in the CZG<sub>5</sub>H catalyst is much smaller<sup>2</sup>. TEM test results show that the addition of Ga makes the catalyst form highly dispersed. The TEM observations are consistent with the findings from XRD.

#### References

- 1 F. Chena, P. P Zhang, Y. Zeng, R. Kosola, L. W. Xiao, X. B Feng, J. Li, G. B Liu, J.H. Wu, G. H. Yan, Y. Yoneyamaa, N. Tsubakia, *Appl. Catal., B*, 2020, **279**, 119382.
- 2 D. Kima, G. Parka, B. Choib, Y. B. Kim, *Int. J. Hydrogen Energy*, 2017, **42**, 29210-29221.

#### Figures and tables

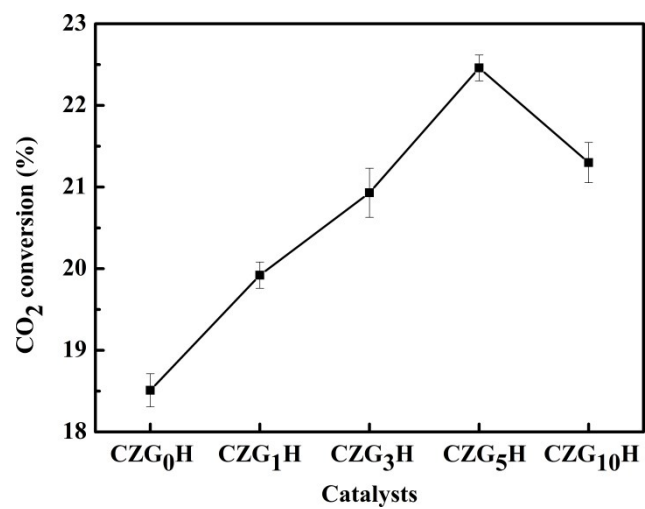

Figure S 1 Carbon dioxide conversion rate of catalysts with different Ga<sub>2</sub>O<sub>3</sub> content

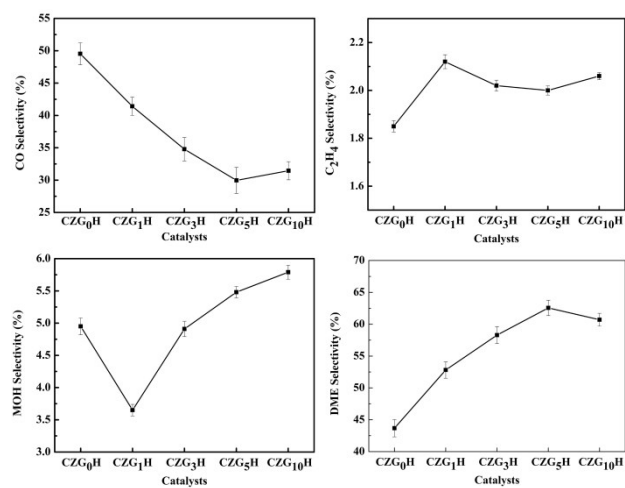

Figure S 2 Selectivity of catalysts with different Ga<sub>2</sub>O<sub>3</sub> content

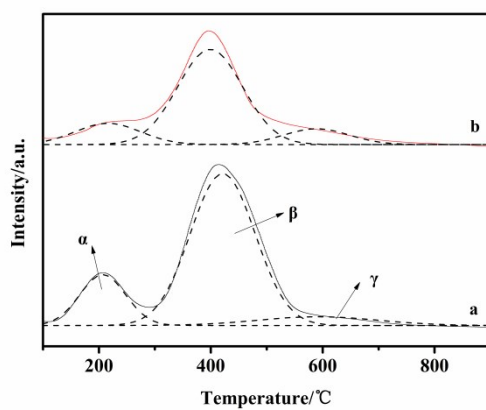

Figure S 3 CO<sub>2</sub>-TPD patterns of the catalysts: a-CZG<sub>0</sub>H, b-CZG<sub>5</sub>H.

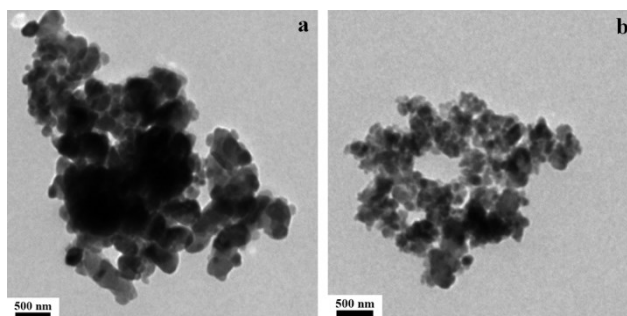

Figure S 4 TEM images of the catalysts: a - CZG<sub>0</sub>H; b - CZG<sub>5</sub>H.

Table S1. Three groups of test results of catalyst

| Catalysts           | Sample 1 | Sample 2 | Sample 3 | Mean | Standard Deviation |
|---------------------|----------|----------|----------|------|--------------------|
| CZG <sub>0</sub> H  | 18.6     | 18.3     | 18.7     | 18.5 | 0.2                |
| CZG <sub>1</sub> H  | 19.9     | 20.1     | 19.8     | 19.9 | 0.2                |
| CZG <sub>3</sub> H  | 20.8     | 21.3     | 20.7     | 20.9 | 0.3                |
| CZG <sub>5</sub> H  | 22.3     | 22.6     | 22.4     | 22.5 | 0.2                |
| CZG <sub>10</sub> H | 21.3     | 21.5     | 21.0     | 21.3 | 0.2                |

Table S2. Reproducibility experiment of catalyst

| Catalysts           | Operator 1 | Operator 2 | Operator 3 | Mean | Standard Deviation |
|---------------------|------------|------------|------------|------|--------------------|
| CZG <sub>0</sub> H  | 18.5       | 17.9       | 18.7       | 18.4 | 0.4                |
| CZG <sub>1</sub> H  | 19.9       | 20.0       | 19.7       | 19.9 | 0.2                |
| CZG <sub>3</sub> H  | 20.9       | 21.3       | 20.8       | 21.0 | 0.3                |
| CZG <sub>5</sub> H  | 22.5       | 22.8       | 22.1       | 22.5 | 0.4                |
| CZG <sub>10</sub> H | 21.3       | 21.0       | 21.3       | 21.2 | 0.2                |

Table S3. The experimental error and reproducibility of Cu dispersion

| Catalysts          | Sample 1 | Sample 2 | Sample 3 | Mean | Standard Deviation | Reproducibility |
|--------------------|----------|----------|----------|------|--------------------|-----------------|
| CZG <sub>5</sub> H | 15.3     | 15.5     | 15.6     | 15.5 | 0.15               | 3               |

Table S4. Peak area and distribution ratio of H<sub>2</sub>-TPR

| Catalysts           | T <sub>α</sub> | T <sub>β</sub> | A <sub>α</sub> +A <sub>β</sub> | A <sub>α</sub> /(A <sub>α</sub> +A <sub>β</sub> ) % |
|---------------------|----------------|----------------|--------------------------------|-----------------------------------------------------|
| CZG <sub>0</sub> H  | 236            | 269            | 6282                           | 53                                                  |
| CZG <sub>1</sub> H  | 238            | 264            | 14463                          | 57                                                  |
| CZG <sub>3</sub> H  | 241            | 270            | 15694                          | 63                                                  |
| CZG <sub>5</sub> H  | 246            | 272            | 15849                          | 69                                                  |
| CZG <sub>10</sub> H | 248            | 277            | 8107                           | 30                                                  |

Table S5. Peak area, peak temperature and distribution ratio of CO<sub>2</sub>-TPD<sup>[a]</sup>

| catalysts          | Weak           |                |                                     | Medium         |                |                                     | Strong         |                |                                     | A <sub>T</sub> |
|--------------------|----------------|----------------|-------------------------------------|----------------|----------------|-------------------------------------|----------------|----------------|-------------------------------------|----------------|
|                    | A <sub>α</sub> | T <sub>α</sub> | A <sub>α</sub> /(A <sub>T</sub> ) % | A <sub>β</sub> | T <sub>β</sub> | A <sub>β</sub> /(A <sub>T</sub> ) % | A <sub>γ</sub> | T <sub>γ</sub> | A <sub>γ</sub> /(A <sub>T</sub> ) % |                |
| CZG <sub>0</sub> H | 218            | 207            | 18                                  | 919            | 421            | 74                                  | 99             | 589            | 8                                   | 1235           |
| CZG <sub>5</sub> H | 192            | 247            | 23                                  | 463            | 397            | 54                                  | 195            | 535            | 23                                  | 850            |

[a] A<sub>α</sub>, A<sub>β</sub>, A<sub>γ</sub>, represent area of the corresponding sites, A<sub>T</sub> represent total peak area.
